# Supplementary material for: Construction of PdO-decorated double-shell ZnSnO3 hollow microspheres for n-propanol detection at low temperature
Source: Royal Society of Chemistry journal article supplement (doi:10.1039/d0qi01292k), 2020-11-23
Supplement: d0qi01292k1.pdf [file d0qi01292k1.pdf]

## **Construction of PdO-decorated double-shell ZnSnO<sub>3</sub> hollow microspheres for n-propanol detection at low temperature**

Liyong Du, Dongxue Wang, Kuikun Gu, Mingzhe Zhang\*

State Key Laboratory of Superhard Materials, College of physics, Jilin University, Changchun 130012, P.R. China.

\* Corresponding author. Email address: zhangmz@jlu.edu.cn

The n-propanol gas was derived by a static liquid-gas method.<sup>1,2</sup> The relationship between the volume of n-propanol solution and the concentration of n-propanol gas could be calculated by the following formula:

$$C = [(22.4 \times d \times \rho \times V_1) / (M \times V_2)] \times 1000$$

Where C (ppm) is the target gas concentration, d is the purity of n-propanol solution,  $\rho$  (g/mL) is the density of n-propanol solution,  $V_1$  ( $\mu$ L) is the injection volume of n-propanol solution,  $V_2$  (L) is the volume of the glass chamber and M (g/mol) is the molecular weight of n-propanol solution. The n-propanol solution is purchased from Aladdin Chemistry Co. Ltd. (Shanghai, China).

### **References**

- [1] L. Li, P. F. Cheng, Y. L. Wang, L. P. Xu, B. Zhang, C. Lv, J. Ma, Y. Zhang, Sb-doped three-dimensional ZnFe<sub>2</sub>O<sub>4</sub> macroporous spheres for N-butanol chemiresistive gas sensors, *Sensors. Actuators B: Chem.*, 2020, **320**, 128384.

[2] P. Sun, W. N. Wang, Y. P. Liu, Y. F. Sun, J. Ma, G. Y. Lu, Hydrothermal synthesis of 3D urchin-like  $\alpha$ -Fe<sub>2</sub>O<sub>3</sub> nanostructure for gas sensor, *Sensors. Actuators B: Chem.*, 2012, **173**, 52-57.

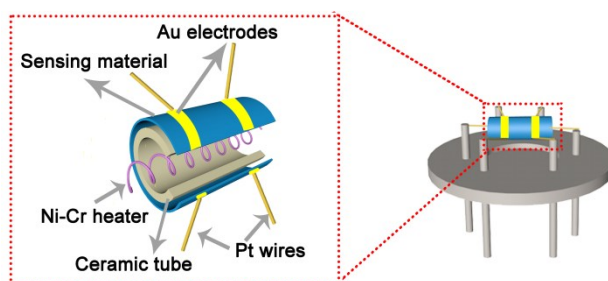

Fig. S1. Schematic structure of the overall gas sensor.

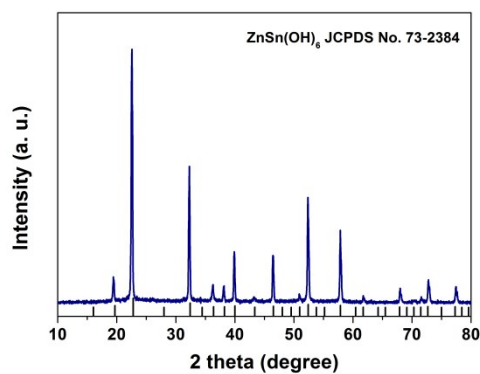

Fig. S2. The XRD pattern of ZnSn(OH)<sub>6</sub> precursor.

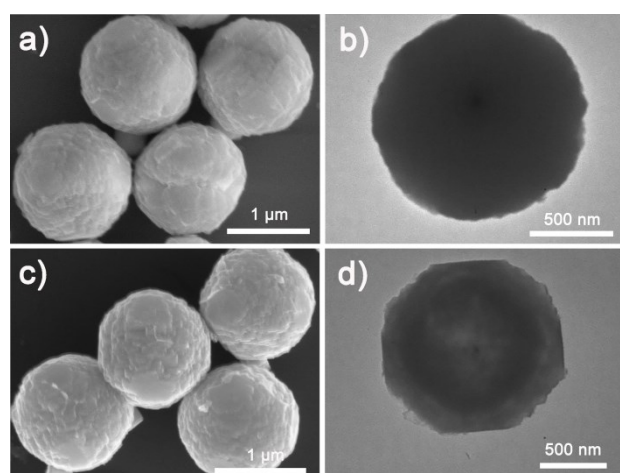

Fig. S3. The FESEM images of (a)  $\text{ZnSn(OH)}_6$  precursor and (c)  $\text{ZnSnO}_3$ ; the TEM images of (b)  $\text{ZnSn(OH)}_6$  precursor and (d)  $\text{ZnSnO}_3$ .

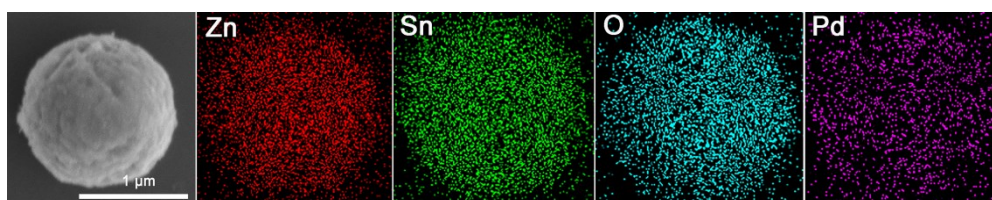

Fig. S4. The elemental mapping image of 4 wt% PdO-loaded  $\text{ZnSnO}_3$  samples.

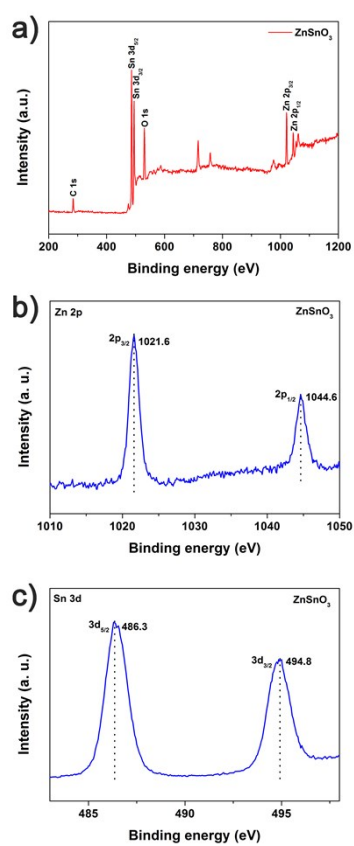

Fig. S5. The XPS spectrum of pure ZnSnO<sub>3</sub>: (a) overall spectrum; (b) Zn 2p and (c) Sn 3d.

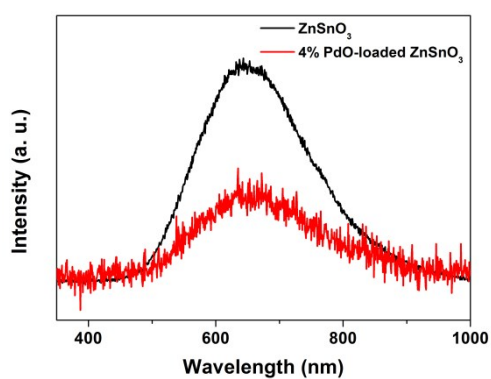

Fig. S6. The room-temperature PL spectrum of pure ZnSnO<sub>3</sub> and 4 wt% PdO-loaded ZnSnO<sub>3</sub> samples.

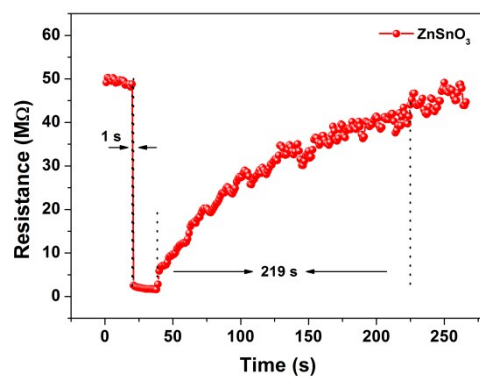

Fig. S7. The response/recovery speed of pure ZnSnO<sub>3</sub> to 100 ppm n-propanol at 200°C.

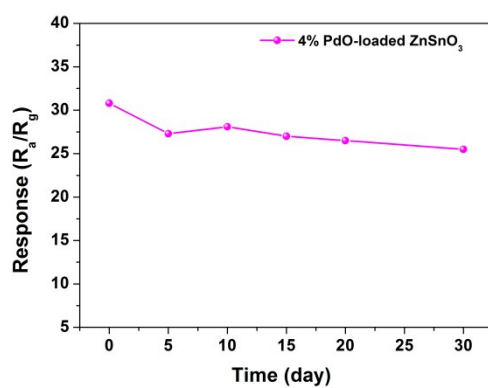

Fig. S8. The long-term stability of the sensor based on 4 wt% PdO-loaded ZnSnO<sub>3</sub> to 100 ppm n-propanol at 140°C.
